# Supplementary material for: A dual-site approach in high-entropy oxide aerogels creates active and selective reverse water–gas shift catalysts
Source: Royal Society of Chemistry journal article supplement (doi:10.1039/d5ta08951d), 2026-01-01
Supplement: d5ta08951d1.pdf [file d5ta08951d1.pdf]

## Supporting information for:

### **A dual-site approach in high-entropy oxide aerogels creates active and selective reverse water–gas shift catalysts**

Travis G. Novak,<sup>\*a</sup> Matthew R. Buck,<sup>b</sup> Austin E. Herzog,<sup>c</sup> Joshua J. Kim,<sup>b</sup> Bethany M. Hudak,<sup>a</sup> Ryan H. DeBlock,<sup>a</sup> Evan R. Glaser,<sup>a</sup> Michelle D. Johannes,<sup>a</sup> Debra R. Rolison<sup>\*a</sup>

- a. U.S. Naval Research Laboratory, Washington, DC 20375, USA
- b. Chemistry Department, United States Naval Academy, Annapolis, MD 21402, USA
- c. NRC Postdoctoral Associate, U.S. Naval Research Laboratory, Washington, DC 20375, USA

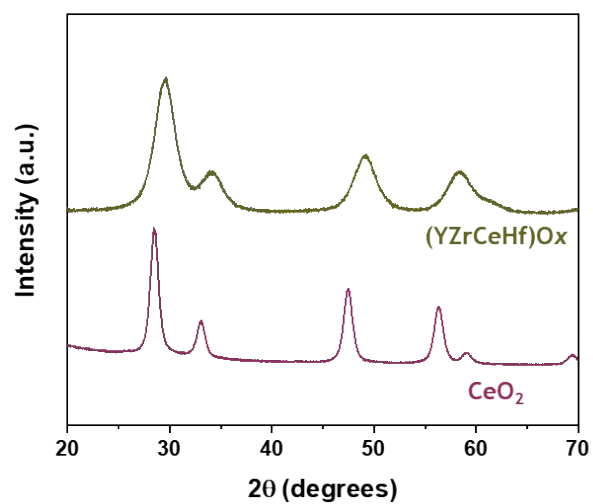

**Fig. S1** | XRD patterns of (YZrCeHf)Ox and CeO<sub>2</sub> aerogels. Both show a simple fluorite structure, but the peaks for (YZrCeHf)Ox are broader and shifted toward a smaller lattice parameter.

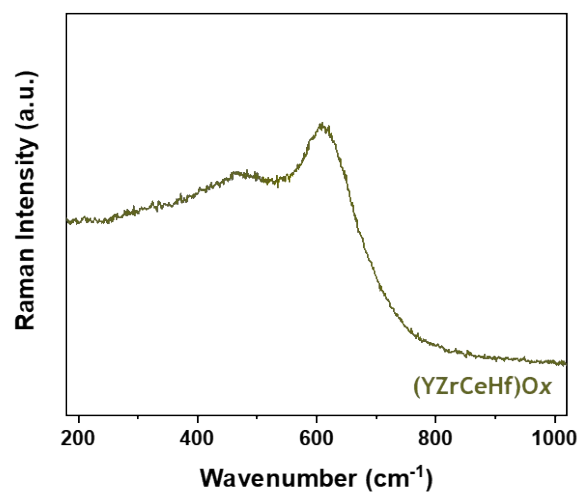

**Fig. S2** | Raman spectrum of (YZrCeHf)Ox aerogel. The broad peak at ~ 600 cm<sup>-1</sup> has been assigned to oxygen vacancies previous high-entropy oxides.

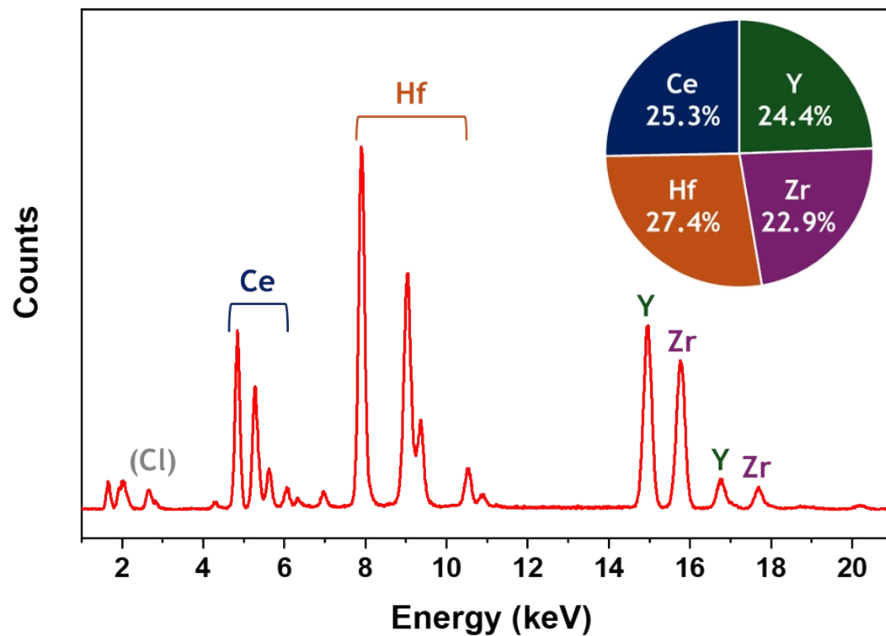

**Fig. S3** | XRF-spectrum of (YZrCeHf)O<sub>x</sub>, with inset showing calculated elemental composition of cations. Some Cl content (~2.7 keV) is present due to the use of chloride precursors.

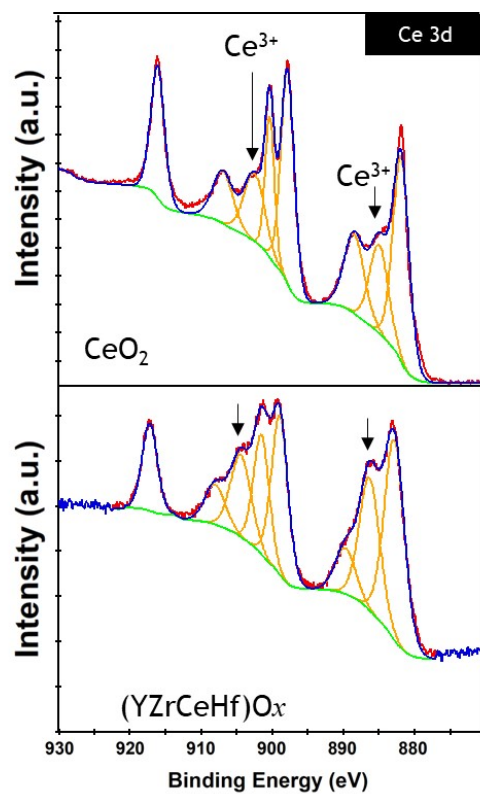

**Fig. S4** | Comparison of the XPS Ce 3d region with CeO<sub>2</sub> and (YZrCeHf)O<sub>x</sub> aerogels.

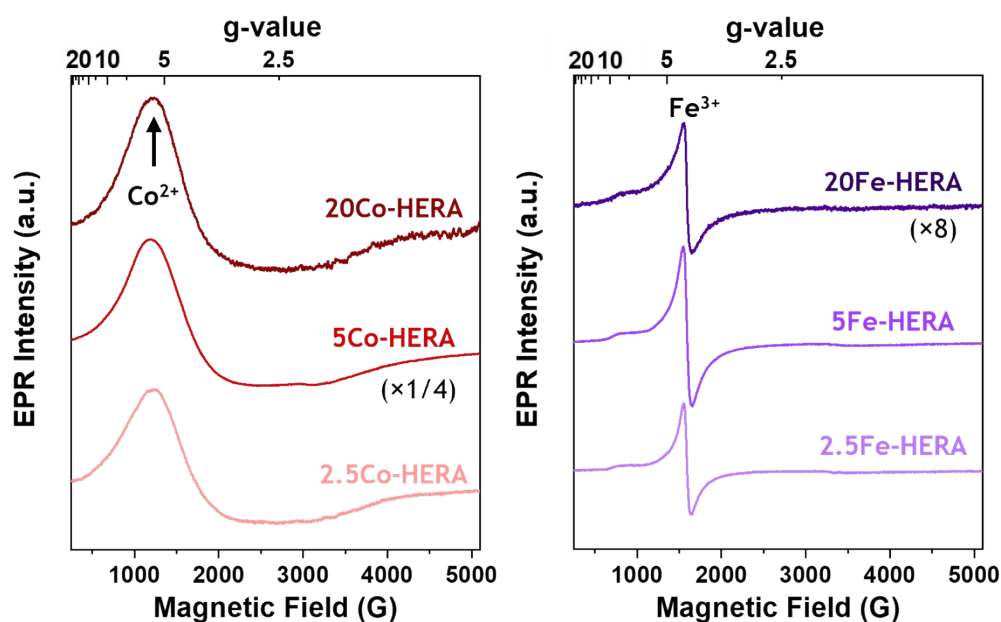

**Fig. S5** | EPR of Co and Fe incorporated HERAs.

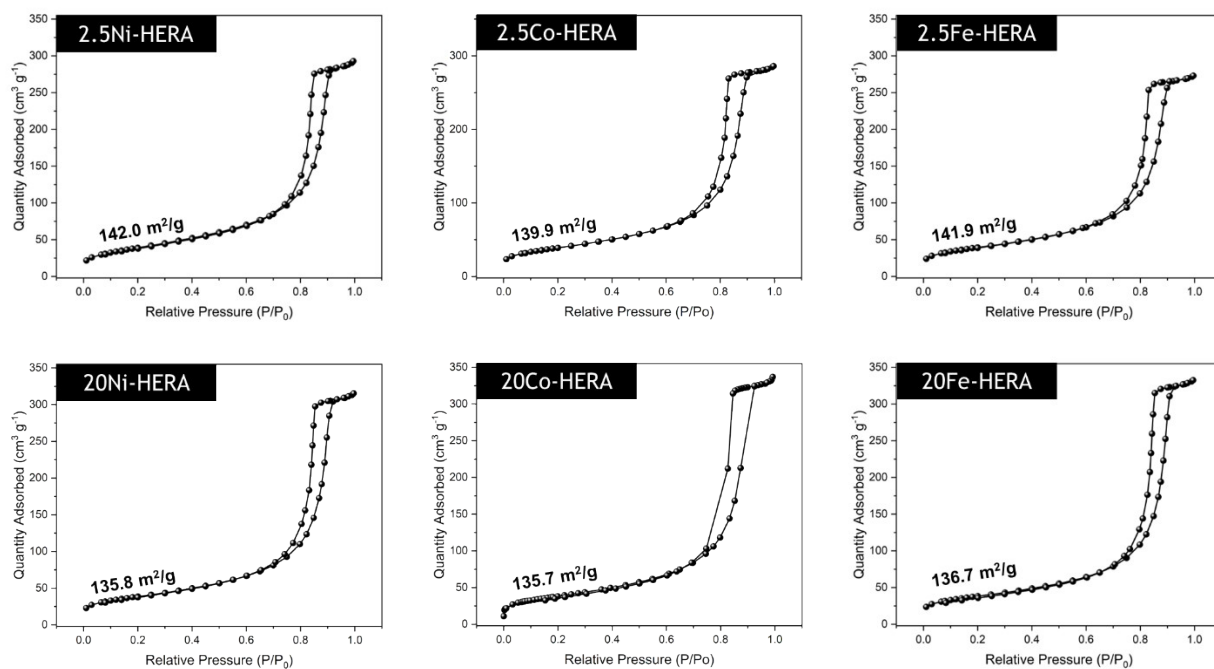

**Fig. S6** |  $\text{N}_2$  isotherms of transition-metal-incorporated HERAs, with BET surface area indicated.

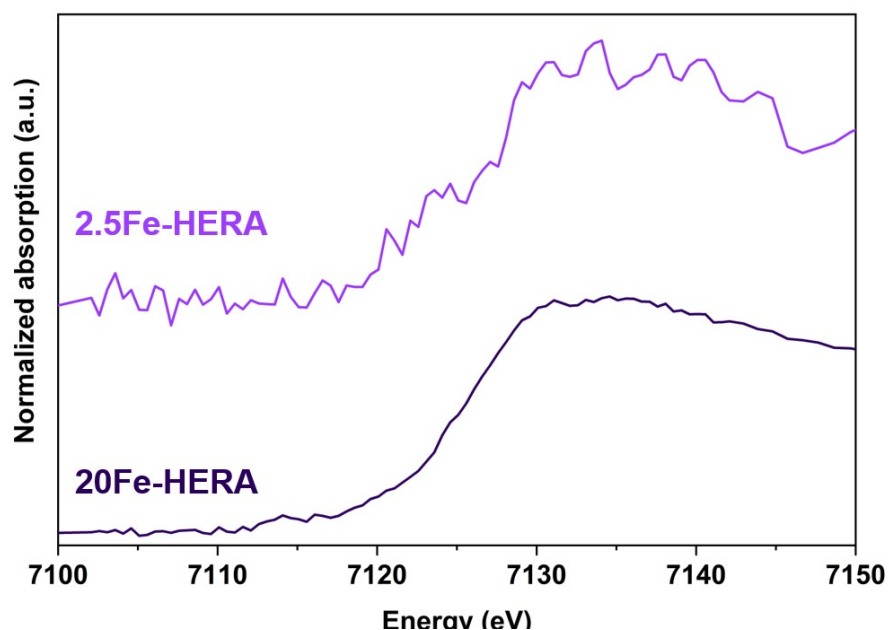

**Fig. S7** | XANES comparison of 2.5Fe-HERA and 20FeHERA

**Table S1** | Comparison of pre-edge peaks for standard Fe<sup>3+</sup> compounds and 20Fe-HERA

| Material                         | Centroid (eV) | Integrated Area <sup>Δ</sup> | Ref.      |
|----------------------------------|---------------|------------------------------|-----------|
| α-Fe <sub>2</sub> O <sub>3</sub> | 7114.4        | 0.15                         | This work |
| α-Fe <sub>2</sub> O <sub>3</sub> | 7114.4*       | 0.12                         | [32]      |
| α-Fe <sub>2</sub> O <sub>3</sub> | 7114.4        | 0.12                         | [31]      |
| FePO <sub>4</sub>                | 7114.5        | 0.32                         | This work |
| FePO <sub>4</sub>                | 7114.5*       | 0.34                         | [32]      |
| FePO <sub>4</sub>                | 7114.5        | 0.25                         | [31]      |
| 20Fe-HERA                        | 7114.1        | 0.12                         | This work |

\* Centroid position adjusted from primary source to account for differences in Fe foil energy calibration

<sup>Δ</sup> Integrated area calculated after background subtraction and fitting the peak near 7114 eV with a single pseudo-Voigt function.

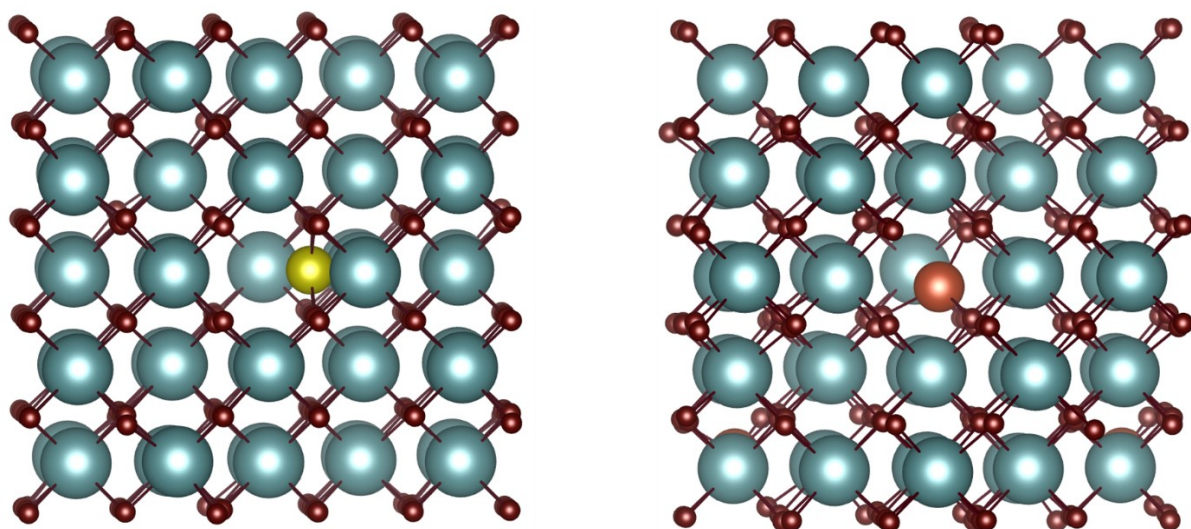

**Fig. S8** | CeO<sub>2</sub> lattice with Ni (left) and Fe (right).

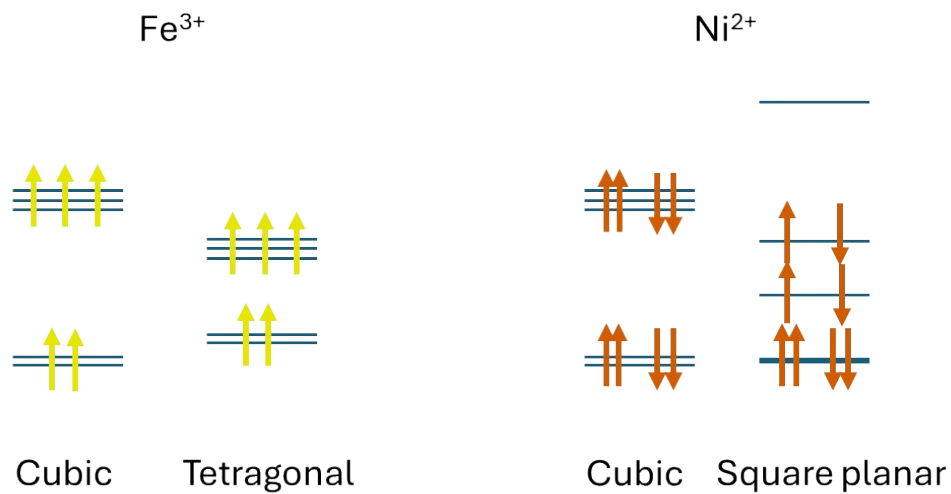

**Fig. S9** | Molecular orbital diagrams for  $\text{Fe}^{3+}$  and  $\text{Ni}^{2+}$ .

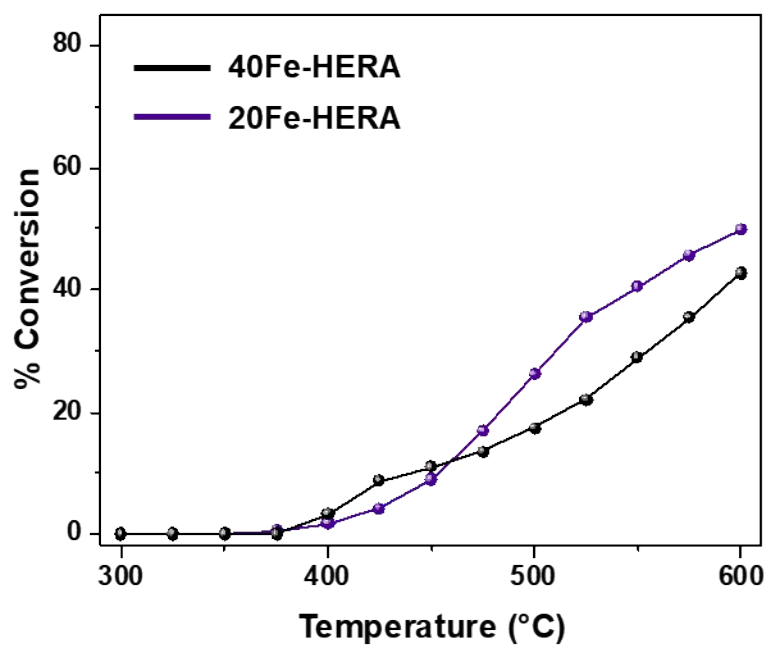

**Fig. S10** | Comparison of 20 and 40 at.% Fe in HERA catalysts. Both catalysts yield entirely CO; no CH<sub>4</sub> is detected.

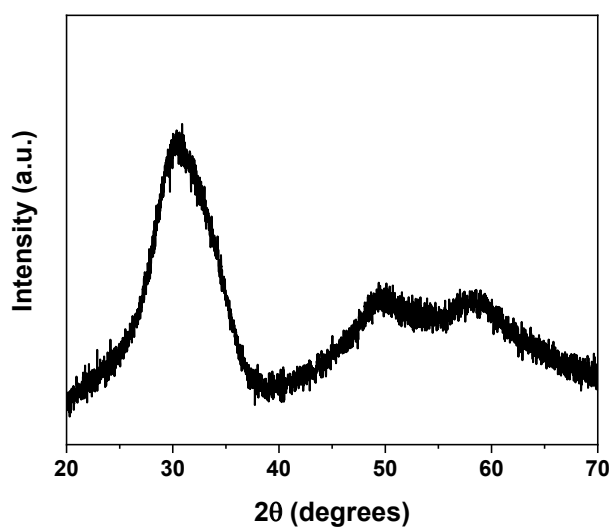

**Fig. S11** | X-ray diffraction pattern of 40Fe-HERA.

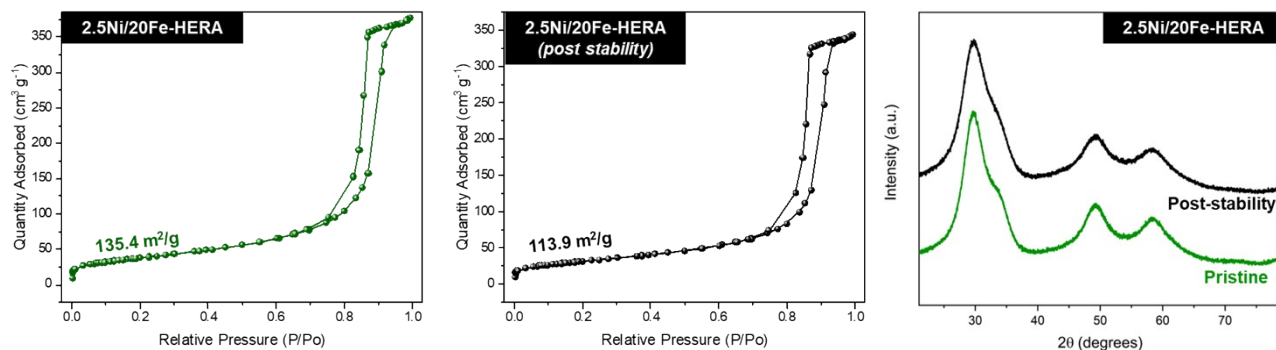

**Fig. S12** |  $N_2$  isotherms showing only slight loss of surface area loss after 90 h at 500 °C. XRD patterns remain entirely fluorite with no other phases detected.

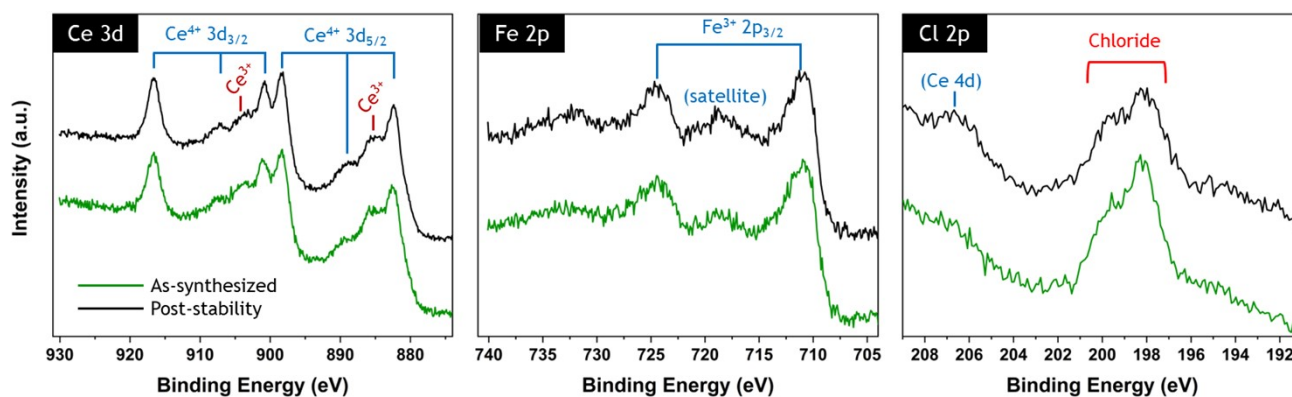

**Fig. S13** | XPS high-resolution scans of the Ce 3d, Fe 2p, and Cl 2p regions of pristine and post-stability tested 2.5Ni-20Fe-HERA.



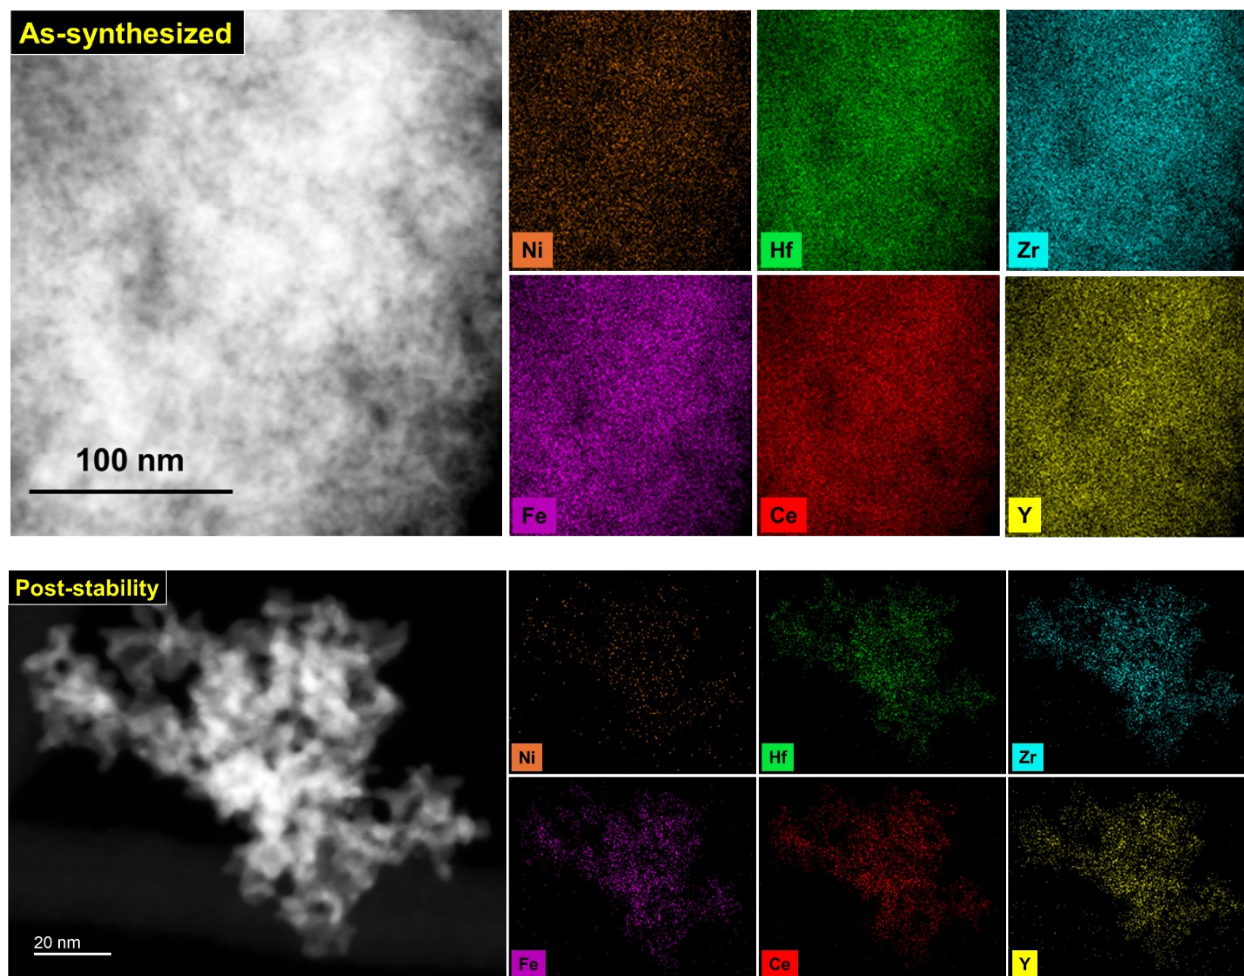

**Fig. S14** | Transmission electron micrographs and EDS elemental maps of pristine (top) and post-stability test (bottom) 2.5Ni-20Fe-HERA .
